# Supplementary material
Source: PubMed Central journal article supplement (PMC9851987)

**Title:** Association between hypertensive disorders of pregnancy and dementia: A systematic review and meta-analysis

**Authors:** Karen C. SCHLIEP, PhD, MSPH;<sup>1</sup> Hailey MCLEAN, BS;<sup>1</sup> Bin YAN, BS;<sup>1</sup> Fares QEADAN, PhD;<sup>2</sup> Lauren H. THEILEN, MD;<sup>3</sup> Adam DE HAVENON, MD;<sup>4</sup> Jennifer J. MAJERSIK, MD;<sup>5</sup> Truls ØSTBYE, MD, PhD;<sup>6</sup> Surendra SHARMA, MD, PhD;<sup>7</sup> Michael W. VARNER, MD<sup>3</sup>

**Affiliations:** Department of Family and Preventative Medicine, University of Utah, Salt Lake City, Utah; <sup>2</sup>Department of Public Health Sciences, Loyola University Chicago, Chicago, Illinois; <sup>3</sup>Department of Obstetrics and Gynecology, University of Utah, Salt Lake City, Utah; <sup>4</sup>Department of Neurology, Yale University, New Haven, CT; <sup>5</sup> Department of Neurology, University of Utah, Salt Lake City, Utah; <sup>6</sup>Community and Family Medicine, Nursing and Global Health, Duke University, Durham, North Carolina; <sup>7</sup>Department of Pediatrics, Women & Infants Hospital, Alpert Medical School of Brown University, Providence, Rhode Island.

**Conflicts of Interest:** The authors declare no conflicts of interest.

**Funding:** This work was supported in part by the National Institute of Aging (NIA) grant: “Hypertensive Disorders of Pregnancy and Subsequent Risk of Vascular Dementia, Alzheimer's Disease, or Related Dementia: A Retrospective Cohort Study Taking into Account Mid-Life Mediating Factors” (Project K01AG058781; PI: Karen Schliep).

**PROSPERO Registration:** ID: CRD42020185630 registered on 05/07/2020.

**Conference Presentation:** A portion of this paper was presented at 34<sup>th</sup> Annual Meeting of the Society for Pediatric and Perinatal Epidemiologic Research (SPER). June 21-22nd, 2021.

**Corresponding Author:** Karen Schliep, PhD, MSPH, Department of Family and Preventive Medicine, 375 Chipeta Way, Suite A, Salt Lake City, Utah 84108. Email: [karen.schliep@utah.edu](mailto:karen.schliep@utah.edu). ORCID: 0000000317713157

**Word Count (abstract and manuscript):** 247 for abstract; 3723 for manuscript

Figure S1: Funnel Plot of HDP and All-Cause Dementia including 5 Cohort Studies

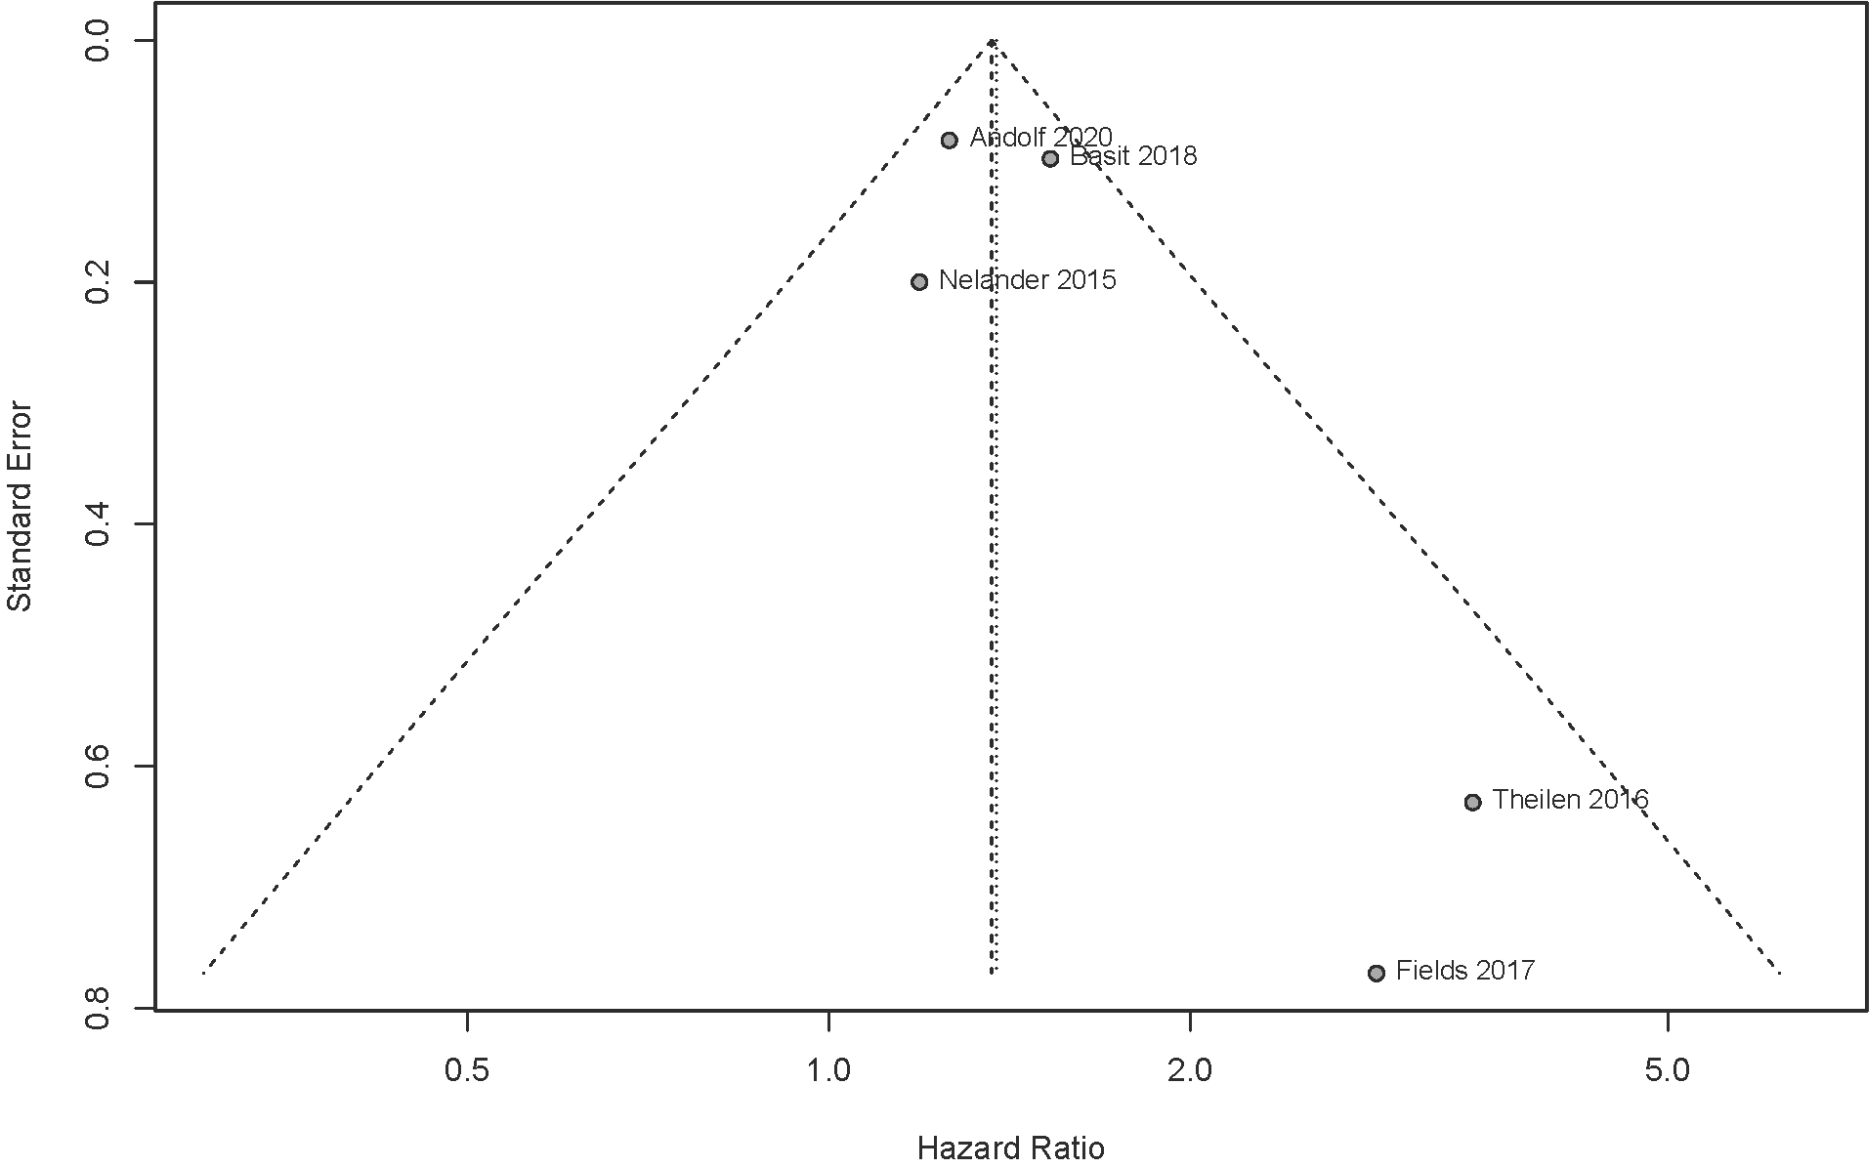

Figure S2: Funnel Plot of HDP and All-Cause Dementia including 5 Cohort Studies and 1 Case Control Study

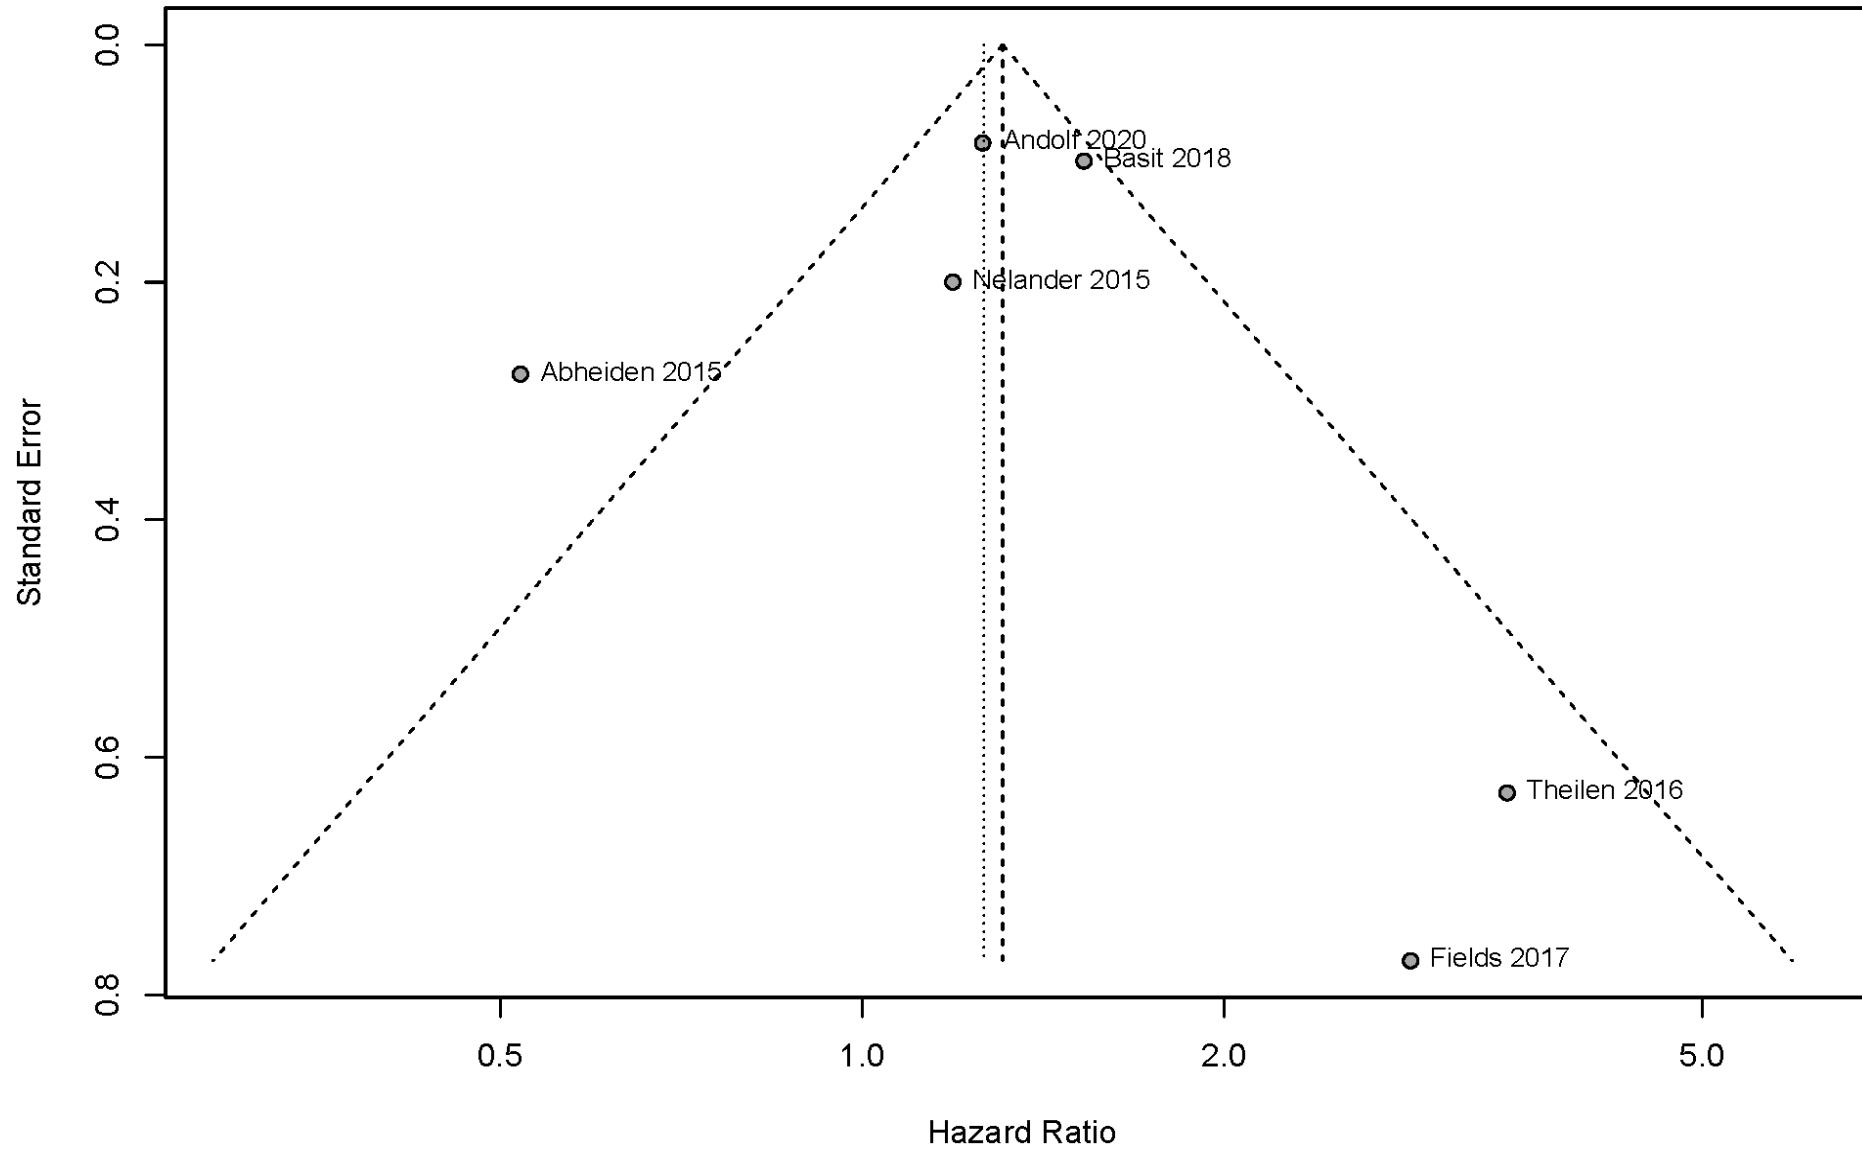

Figure S3: Pooled Hazard Ratio (Forest Plot) for the Risk of All-Cause Dementia with All-Cause HDP, with Leave One Out Method to Assess Influential Studies

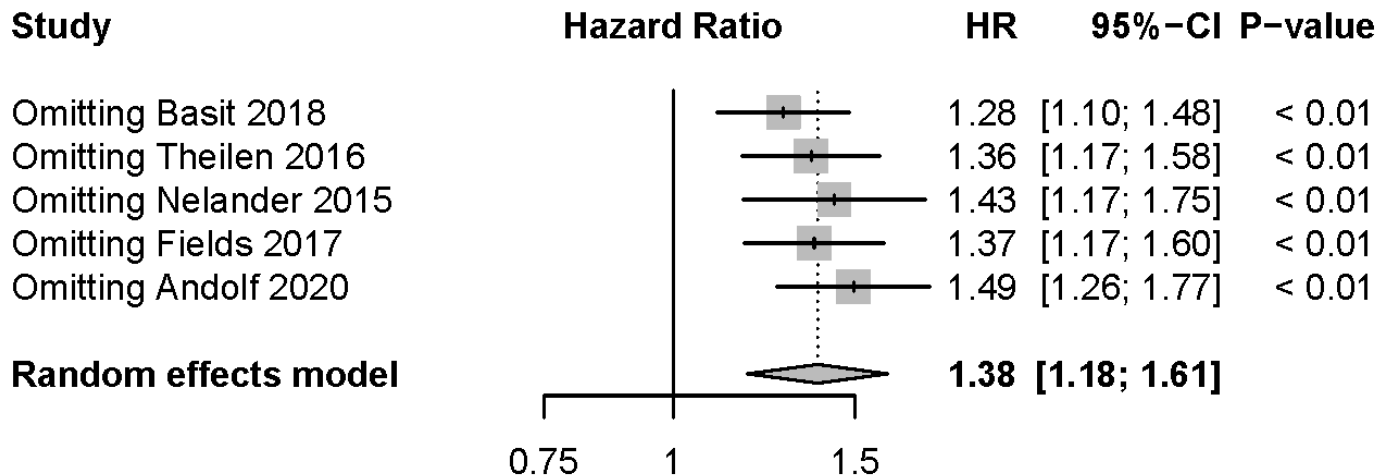

Figure S4: Pooled Hazard Ratio (Forest Plot) for the Risk of All-Cause Dementia with All-Cause Hypertensive Disorders of Pregnancy

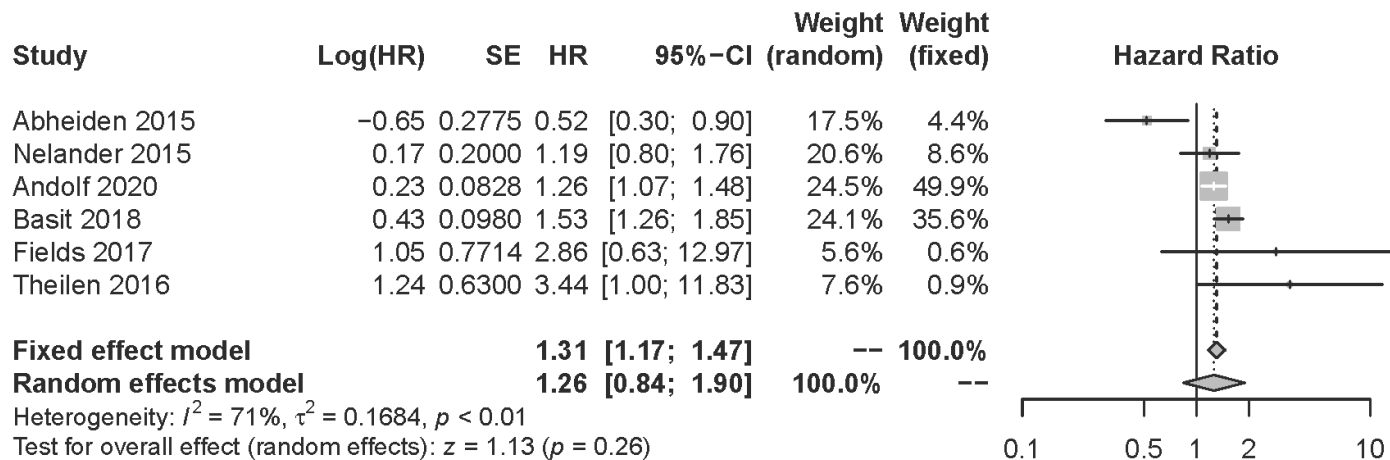

# Figure S5: Pooled Hazard Ratio (Forest Plot) for the Risk of Alzheimer's Disease, Vascular Dementia, and Other/Unspecified Dementia with Hypertensive Disorders of Pregnancy

## Alzheimer's Disease

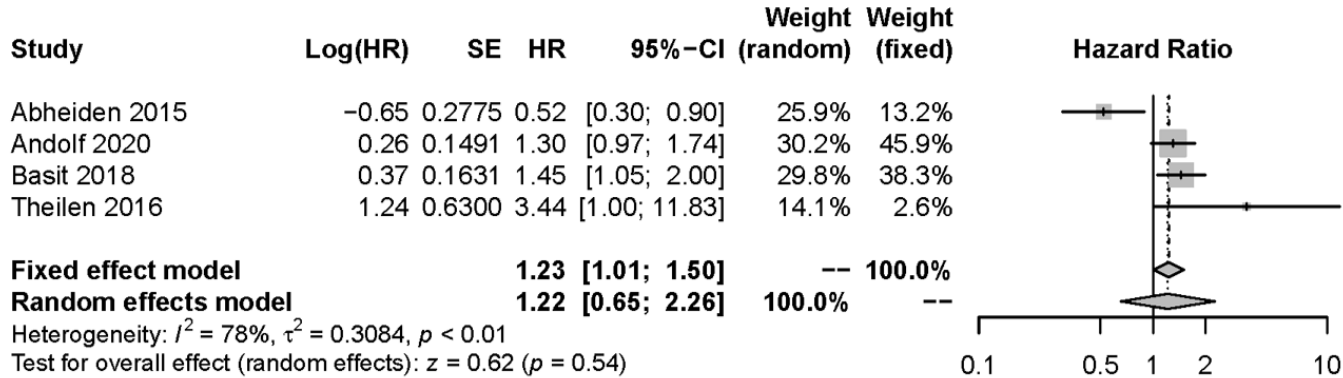

## Vascular Dementia

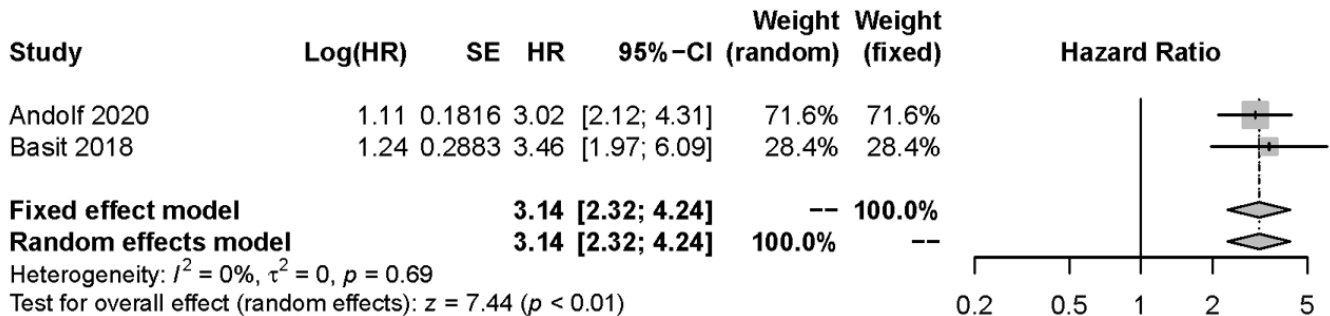

## Other Dementia

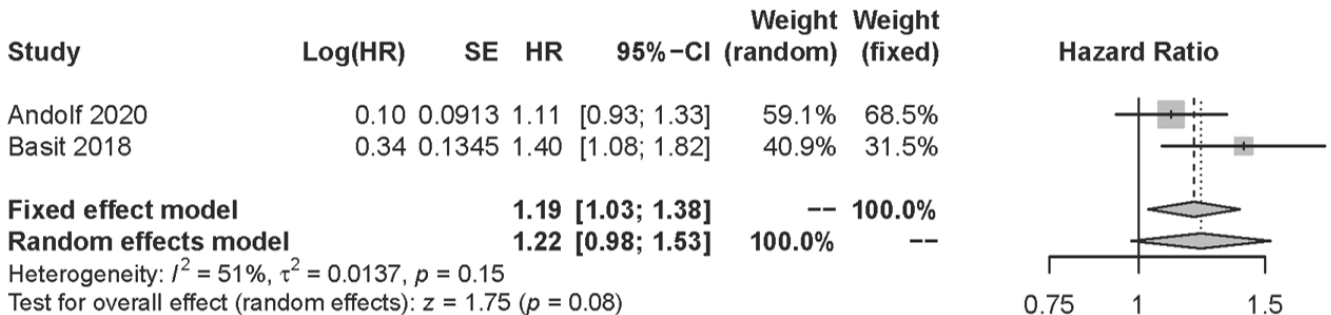

# Figure S6: Pooled Hazard Ratio (Forest Plot) for the Risk of All-Cause Dementia with Gestational Hypertension, or Preeclampsia/Eclampsia

## Gestational Hypertension

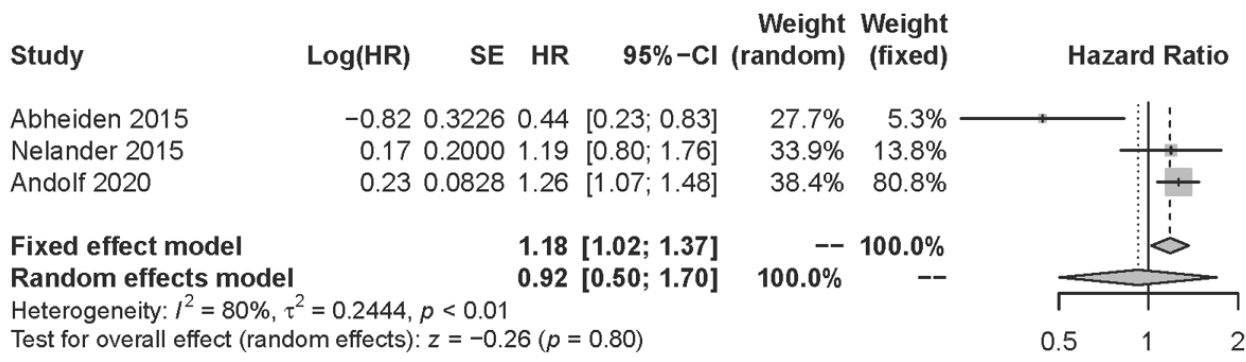

## Preeclampsia/Eclampsia

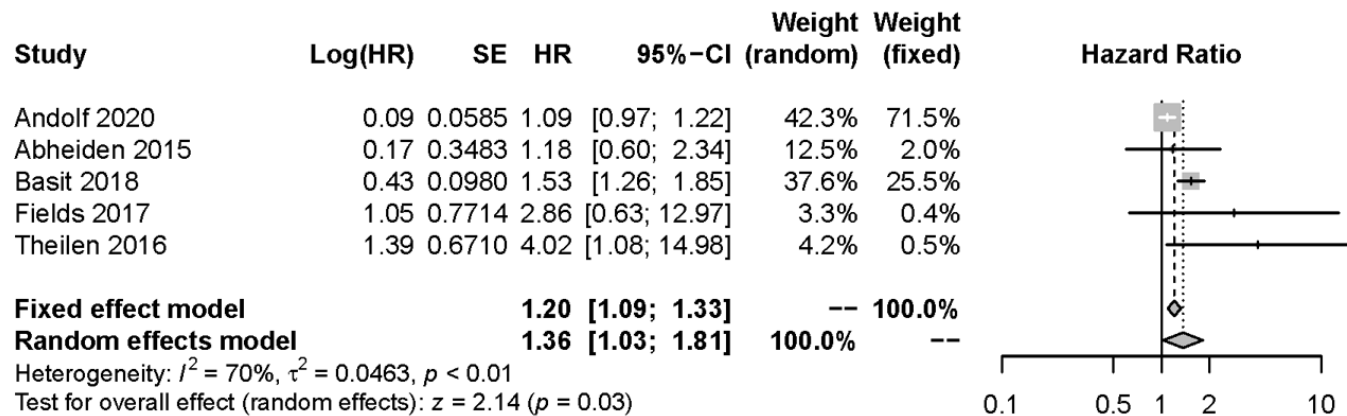

Figure S7: Pooled Hazard Ratio (Forest Plot) for the Risk of All-Cause Dementia with All-Cause HDP, with Leave One Out Method to Assess Influential Studies

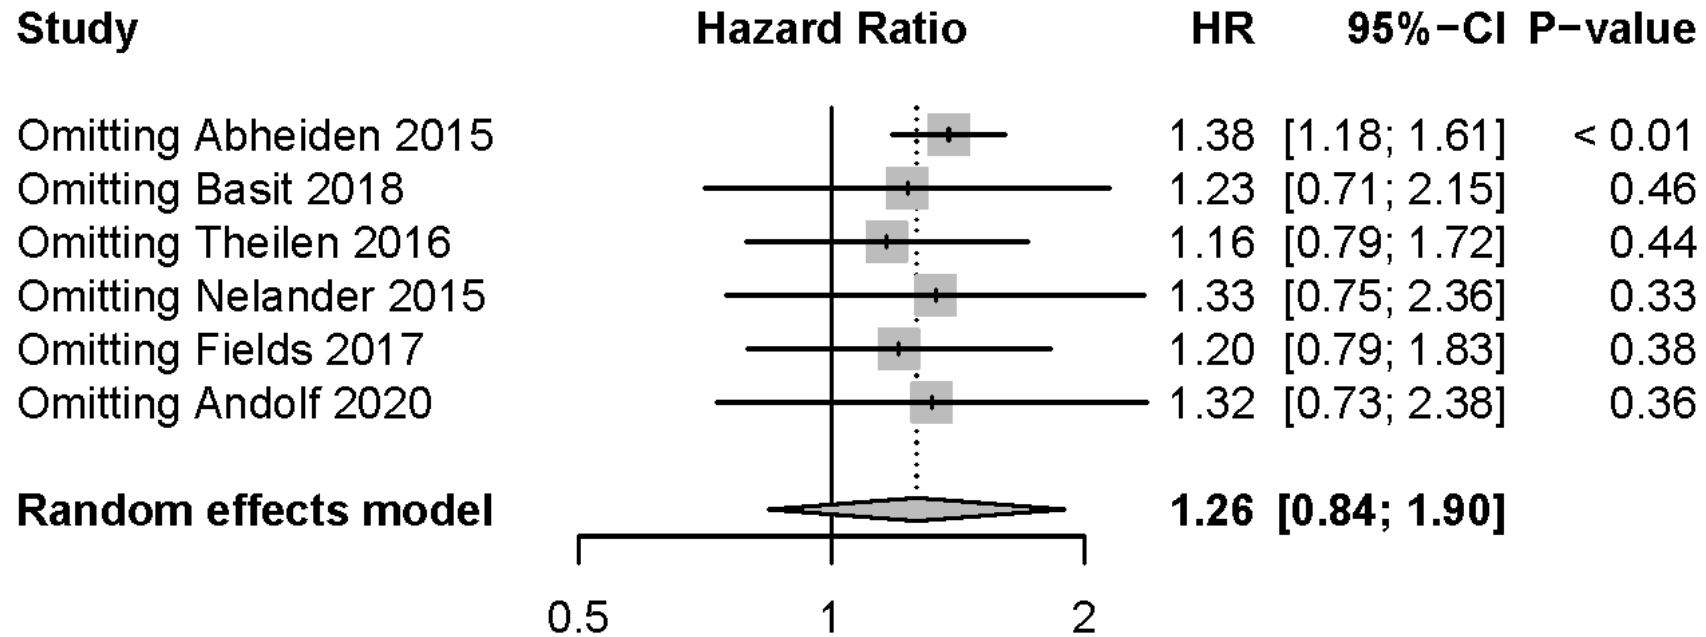

Supplement: NIHMS1844048-supplement-Supplemental_Publication_Material.pdf [file NIHMS1844048-supplement-Supplemental_Publication_Material.pdf]
