# Supplementary material
Source: PubMed Central journal article supplement (PMC9851987)
Supplement: NIHMS1844048-supplement-Permission_not_needed.pdf [file NIHMS1844048-supplement-Permission_not_needed.pdf]

**From:** [Karen Schliep](#)  
**To:** [Hypertension](#)  
**Subject:** RE: HYPE/2022/19399R2: Request Final Files - style issues  
**Date:** Monday, October 17, 2022 4:37:23 PM  
**Attachments:** [image003.png](#)  
[image004.png](#)

---

\*\*\* **CAUTION:** This email originated from outside of the **American Heart Association**. Do **not** click links or open attachments unless you recognize the sender and know the content is safe. \*\*\*

Oh got it. These tables were created by me. There is no need for permission to publish them.

---

**From:** Hypertension <[hypertension@heart.org](mailto:hypertension@heart.org)>  
**Sent:** Monday, October 17, 2022 4:33 PM  
**To:** Karen Schliep <[Karen.Schliep@hsc.utah.edu](mailto:Karen.Schliep@hsc.utah.edu)>  
**Subject:** RE: HYPE/2022/19399R2: Request Final Files - style issues

Dr. Schiep,

Actually, if permission is really needed, it has to come from the journals whose references are listed from. What we would like to know is whether your tables' data were taken from tables published in other journals, then you would have to request permission to publish them. Otherwise, permission is not needed.

Let me know if you have any questions,

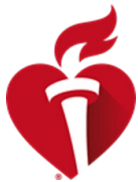

**Renata Gil**  
Assistant Managing Editor  
Hypertension  
American Heart Association

- Legend of table 1 and table 2 refers to references in the text of the manuscript. Please provide permission to reprint or include a statement that permission is not necessary (and why) by email.

---

**From:** Karen Schliep <[Karen.Schliep@hsc.utah.edu](mailto:Karen.Schliep@hsc.utah.edu)>  
**Sent:** Monday, October 17, 2022 4:28 PM  
**To:** Hypertension <[hypertension@heart.org](mailto:hypertension@heart.org)>  
**Subject:** RE: HYPE/2022/19399R2: Request Final Files - style issues

---

\*\*\* **CAUTION:** This email originated from outside of the **American Heart Association**. Do **not** click links or open attachments unless you recognize the sender and know the content is safe. \*\*\*

In regards to “Legend of table 1 and table 2 refers to references in the text of the manuscript.”  
I provide permission to reprint.

---

**From:** Hypertension <[hypertension@heart.org](mailto:hypertension@heart.org)>  
**Sent:** Monday, October 17, 2022 4:14 PM  
**To:** Karen Schliep <[Karen.Schliep@hsc.utah.edu](mailto:Karen.Schliep@hsc.utah.edu)>  
**Subject:** RE: HYPE/2022/19399R2: Request Final Files - style issues

Dr. Schliep,

Thanks for sending the statement below. We will be waiting for the remaining style issues to be addressed.

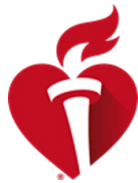

**Renata Gil**  
Assistant Managing Editor  
Hypertension  
American Heart Association

I confirm selection of Authorship Responsibility and Copyright Transfer Agreement MEETS THE NEEDS OF THE FUNDERS OF EVERY AUTHOR and accept responsibility for all costs associated with this choice.

Karen Schliep, PhD MSPH  
Associate Professor  
Division of Public Health  
Department of Family and Preventive Medicine  
**University of Utah Health**  
Preferred pronouns: She/Her

---

**From:** Karen Schliep <[Karen.Schliep@hsc.utah.edu](mailto:Karen.Schliep@hsc.utah.edu)>  
**Sent:** Monday, October 17, 2022 2:12 PM  
**To:** Hypertension <[hypertension@heart.org](mailto:hypertension@heart.org)>

**Subject:** RE: HYPE/2022/19399R2: Request Final Files - style issues

**\*\*\* CAUTION:** This email originated from outside of the **American Heart Association**. Do **not** click links or open attachments unless you recognize the sender and know the content is safe. **\*\*\***

I confirm that I have read and am fully aware of the costs associated with publishing my manuscript.

Karen Schliep, PhD MSPH  
Associate Professor  
Division of Public Health  
Department of Family and Preventive Medicine  
**University of Utah Health**  
Preferred pronouns: She/Her

---

**From:** [hypertension@heart.org](mailto:hypertension@heart.org) <[hypertension@heart.org](mailto:hypertension@heart.org)>  
**Sent:** Monday, October 17, 2022 2:00 PM  
**To:** Karen Schliep <[Karen.Schliep@hsc.utah.edu](mailto:Karen.Schliep@hsc.utah.edu)>  
**Subject:** HYPE/2022/19399R2: Request Final Files - style issues

PLEASE READ: During this unprecedented and challenging time, the health and safety of you, your family, and your community is of utmost importance. We appreciate that one aspect of this current situation is the inability to continue research work and that some measures will lead to a significant hindering of research progress. Please know that we are flexible regarding turnaround times for revisions and other tasks during this stressful time and deadlines will be extended as needed. If you are able to, please contact us if you need any extensions or if you experience any challenges around manuscript preparation; we will work with you.

17-Oct-2022

Dr. Karen Schliep  
University of Utah  
Family and Preventive Medicine  
375 Chipeta Way, Suite A  
Salt Lake City, Utah 84108

MS ID#: HYPE/2022/19399R2  
MS TITLE: Association between hypertensive disorders of pregnancy and dementia: A systematic review and meta-analysis

Dear Dr. Schliep:

I am pleased to inform you that your Uninvited Review is potentially acceptable for publication in Hypertension providing the items below are addressed. Please note that we

cannot send your manuscript to production until the items below are addressed completely and in full.

**ACCESS LICENSE RESPONSE REQUIRED:** You previously selected that the Authorship Responsibility and Copyright Transfer Agreement authorship forms cover the access licensing REQUIREMENTS OF YOUR FUNDERS for ALL AUTHORS related to this manuscript. Examples include, RUCK, Wellcome Trust, British Heart Foundation, Gates Foundation etc. It is NOT acceptable to change your licensing preference after your manuscript has been accepted, nor after it has gone to production. **Therefore, please respond in email reply, "I confirm selection of Authorship Responsibility and Copyright Transfer Agreement MEETS THE NEEDS OF THE FUNDERS OF EVERY AUTHOR and accept responsibility for all costs associated with this choice."**

**PUBLICATION FEES RESPONSE REQUIRED:** Publication fees will apply to your manuscript. All information regarding publication fees can be accessed at <https://www.ahajournals.org/hyp/revise-accepted-manuscripts>. **After doing so, please also respond in email reply, "I confirm that I have read and am fully aware of the costs associated with publishing my manuscript."**

- Remove the section Novelty and Relevance.
- Place figure legends before tables.
- Place Sources of Funding and Disclosures before the reference section.
- The font size of tables has to be 12 pt.
- Legend of table 1 and table 2 refers to references in the text of the manuscript. Please provide permission to reprint or include a statement that permission is not necessary (and why) by email.
- Pages 13 and 14 - text of the manuscript - Supplemental tables and supplemental figures must be cited as table S1, S2, S3 or figure S1, S2, S3 etc.
- Online supplement - place a completed title page before supplemental figures.

Authorship changes are not allowed post acceptance. If you make any changes in authorship of your manuscript (additions, deletions, change of order) prior to acceptance, you must complete a Change of Authorship Form and have all authors sign agreeing to the change. If your manuscript is accepted, it will not be possible to publish it until all signatures are in place. The form may be downloaded from [https://www.ahajournals.org/pb-assets/migration/COA\\_Form-1532532203410.pdf](https://www.ahajournals.org/pb-assets/migration/COA_Form-1532532203410.pdf).

The files are needed before your manuscript can enter the production cycle. When all listed items are complete please submit online at <https://hype-submit.aha-journals.org/cgi-bin/main.plex?el=A1Hm6DHTL5C1FRZL1BS3A9ftdbz5OvncVtgRQizhbXKQugZ>.

Please contact our editorial office if you have questions about the items requested ( [hypertension@heart.org](mailto:hypertension@heart.org) ). We will not be able to submit your manuscript for publication until final materials are received in this editorial office. Also, the date your final materials are received will be published in Hypertension as the acceptance date for your manuscript.

Thanks again for submitting your interesting work to Hypertension. We look forward to receiving future manuscripts from you. With kind regards,

Sincerely,

Renata Gil  
Assistant Managing Editor  
Hypertension Editorial Office

---

To submit, go to [https://hype-submit.aha-journals.org/cgi-bin/main.plex?  
el=A1Hm6DHTL5C1FRZL1BS3A9ftdbz5OvncVtgRQizhbXKQugZ](https://hype-submit.aha-journals.org/cgi-bin/main.plex?el=A1Hm6DHTL5C1FRZL1BS3A9ftdbz5OvncVtgRQizhbXKQugZ)
